# Supplementary material
Source: Springer Nature journal article supplement (https://www.springermedizin.de/resource/supplementary/12943_2012_1042_MOESM4_ESM.pdf/9552168)

**A**

MDA-MB-231

CAMA-1

low endogenous rab31 expression

no endogenous rab31 expression

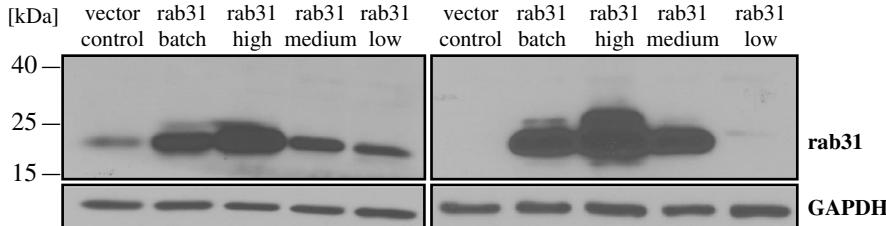**B**

MDA-MB-231

CAMA-1

rab31 [ng/mg protein]

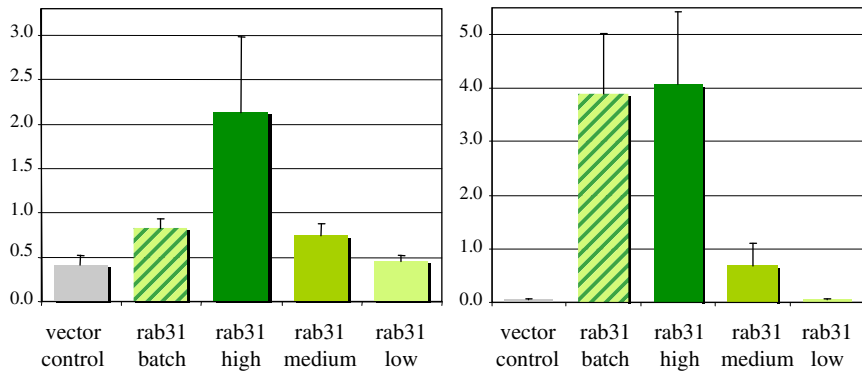

Supplement: MOESM4 [file 9552168]
